# Supplementary material for: Photosynthetic response of Persian Gulf acroporid corals to summer versus winter temperature deviations
Source: PeerJ. 2015 Jun 30;3:e1062. doi: 10.7717/peerj.1062 (PMC4493696; doi:10.7717/peerj.1062)
Supplement: Supplemental Information 1 [file peerj-03-1062-s001.xls]

## Sheet: Winter
Light condition	Date and Time	(Downstream O2(mg/l) - upstream O2) of Sample1	(Downstream O2 - upstream O2) of Sample2	Temperature (̊C)				Weights (gr)
Light	2013-02-02 14:40:38	0.19	0.39	22.9			Sample1	74.22
Light	2013-02-02 14:35:38	0.19	0.4	22.8			Sample2	144.36
Light	2013-02-02 14:30:38	0.19	0.4	22.7			Sample3	49.69
Light	2013-02-02 14:25:38	0.19	0.4	22.5
Light	2013-02-02 14:20:38	0.21	0.41	22.7		Treatments	~23 (̊C)-Light	~23 (̊C)-Dark	~20 (̊C)-Light	~20 (̊C)-Dark	~23 (̊C)	~20 (̊C)
Light	2013-02-02 14:15:38	0.2	0.39	22.9		Responses	Downstream O2 - upstream O2	Downstream O2 - upstream O2	Downstream O2 - upstream O2	Downstream O2 - upstream O2	Pn/lRl
Light	2013-02-02 14:10:38	0.19	0.4	22.8		Sample1	0.191667	-0.117778	0.1625	-0.0725	1.62736	2.24138
Light	2013-02-02 14:05:38	0.19	0.4	22.7		Sample2	0.399167	-0.198889	0.348125	-0.130833	2.00698	2.66083
Light	2013-02-02 14:00:38	0.18	0.4	22.6		Sample3	0.173846	-0.089	0.199231	-0.0554545	1.95333	3.59269
Light	2013-02-02 13:55:38	0.2	0.4	22.6		Mean	0.254893	-0.135222	0.236619	-0.0862626	1.86256	2.83163
Light	2013-02-02 13:50:38	0.18	0.4	22.9
Light	2013-02-02 13:45:38	0.19	0.4	22.8			Pn (mgO2.l-1. min-1)	R (mgO2.l-1. min-1)	Pn (mgO2.l-1. min-1)	R (mgO2.l-1. min-1)
Dark	2013-02-02 17:00:38	-0.12	-0.21	22.5		Sample1	0.0958333	-0.0588889	0.08125	-0.03625
Dark	2013-02-02 16:55:38	-0.12	-0.2	22.8		Sample2	0.199583	-0.0994444	0.174063	-0.0654167
Dark	2013-02-02 16:50:38	-0.12	-0.2	22.9		Sample3	0.0869231	-0.0445	0.0996154	-0.0277273
Dark	2013-02-02 16:45:38	-0.12	-0.2	22.8		Mean	0.127447	-0.0676111	0.118309	-0.0431313
Dark	2013-02-02 16:40:38	-0.12	-0.22	22.7
Dark	2013-02-02 16:35:38	-0.12	-0.2	22.7
Dark	2013-02-02 16:30:38	-0.12	-0.19	22.6
Dark	2013-02-02 16:25:38	-0.11	-0.18	22.5
Dark	2013-02-02 16:20:38	-0.11	-0.19	22.9
Light	2013-02-02 20:00:38	0.18	0.37	19.5
Light	2013-02-02 19:55:38	0.18	0.35	19.9
Light	2013-02-02 19:50:38	0.18	0.36	20.1
Light	2013-02-02 19:45:38	0.16	0.35	20
Light	2013-02-02 19:40:38	0.16	0.34	19.9
Light	2013-02-02 19:35:38	0.15	0.35	19.7
Light	2013-02-02 19:30:38	0.17	0.37	19.5
Light	2013-02-02 19:25:38	0.16	0.35	19.8
Light	2013-02-02 19:20:38	0.16	0.33	20.2
Light	2013-02-02 19:15:38	0.16	0.34	20
Light	2013-02-02 19:10:38	0.16	0.34	19.9
Light	2013-02-02 19:05:38	0.14	0.34	19.8
Light	2013-02-02 19:00:38	0.15	0.34	19.5
Light	2013-02-02 18:55:38	0.17	0.36	19.8
Light	2013-02-02 18:50:38	0.17	0.35	20.1
Light	2013-02-02 18:45:38	0.15	0.33	20.1
Dark	2013-02-02 22:35:37	-0.09	-0.15	20
Dark	2013-02-02 22:30:38	-0.08	-0.14	19.8
Dark	2013-02-02 22:25:38	-0.08	-0.14	19.7
Dark	2013-02-02 22:20:38	-0.07	-0.12	19.5
Dark	2013-02-02 22:15:38	-0.07	-0.12	19.8
Dark	2013-02-02 22:10:38	-0.08	-0.13	20.1
Dark	2013-02-02 22:05:38	-0.08	-0.14	20
Dark	2013-02-02 22:00:38	-0.07	-0.13	20
Dark	2013-02-02 21:55:38	-0.07	-0.14	19.8
Dark	2013-02-02 21:50:38	-0.07	-0.13	19.7
Dark	2013-02-02 21:45:38	-0.06	-0.11	19.5
Dark	2013-02-02 21:40:38	-0.05	-0.12	19.8
Sample3
Light	2013-03-02 13:30:38	0.18		22.9
Light	2013-03-02 13:35:38	0.17		23
Light	2013-03-02 13:40:38	0.19		23
Light	2013-03-02 13:45:38	0.17		23
Light	2013-03-02 13:50:38	0.18		22.9
Light	2013-03-02 13:55:38	0.18		22.9
Light	2013-03-02 14:00:38	0.18		22.9
Light	2013-03-02 14:05:38	0.17		23
Light	2013-03-02 14:10:38	0.18		23
Light	2013-03-02 14:15:38	0.16		23
Light	2013-03-02 14:20:38	0.16		22.9
Light	2013-03-02 14:25:38	0.17		22.9
Light	2013-03-02 14:30:38	0.17		23
Dark	2013-03-02 17:00:38	-0.09		22.8
Dark	2013-03-02 17:05:38	-0.09		22.8
Dark	2013-03-02 17:10:38	-0.08		22.8
Dark	2013-03-02 17:15:38	-0.08		22.8
Dark	2013-03-02 17:20:38	-0.09		22.8
Dark	2013-03-02 17:25:38	-0.1		22.8
Dark	2013-03-02 17:30:38	-0.09		22.8
Dark	2013-03-02 17:35:38	-0.09		22.8
Dark	2013-03-02 17:40:38	-0.1		22.8
Dark	2013-03-02 17:45:38	-0.08		22.8
Light	2013-03-02 20:30:38	0.21		20.5
Light	2013-03-02 20:35:38	0.2		20.5
Light	2013-03-02 20:40:38	0.21		20.5
Light	2013-03-02 20:45:38	0.19		20.5
Light	2013-03-02 20:50:38	0.2		20.6
Light	2013-03-02 20:55:38	0.21		20.6
Light	2013-03-02 21:00:38	0.19		20.6
Light	2013-03-02 21:05:38	0.21		20.6
Light	2013-03-02 21:10:38	0.19		20.7
Light	2013-03-02 21:15:38	0.19		20.7
Light	2013-03-02 21:20:38	0.2		20.7
Light	2013-03-02 21:25:38	0.19		20.8
Light	2013-03-02 21:30:38	0.2		20.8
Dark	2013-04-02 00:00:38	-0.06		20.2
Dark	2013-04-02 00:05:38	-0.06		20.2
Dark	2013-04-02 00:10:38	-0.06		20.2
Dark	2013-04-02 00:15:38	-0.06		20.2
Dark	2013-04-02 00:20:38	-0.05		20.2
Dark	2013-04-02 00:25:38	-0.06		20.2
Dark	2013-04-02 00:30:38	-0.06		20.2
Dark	2013-04-02 00:35:38	-0.05		20.2
Dark	2013-04-02 00:40:38	-0.05		20.2
Dark	2013-04-02 00:45:38	-0.04		20.2
Dark	2013-04-02 00:50:38	-0.06		20.2

## Sheet: Summer
Light condition	Date and Time	(Downstream O2(mg/l) - upstream O2) of Sample1	(Downstream O2 - upstream O2) of Sample2	Temperature (̊C)			Weights (gr)
Light	2012-09-06 02:06:04	0.17	0.15	31.7		Sample1	45.44
Light	2012-09-06 02:01:04	0.17	0.15	31.7		Sample2	39.49
Light	2012-09-06 01:56:04	0.18	0.15	31.7		Sample3	49.42
Light	2012-09-06 01:51:04	0.16	0.15	31.7		Sample4	51.85
Light	2012-09-06 01:46:04	0.17	0.15	31.7		Sample5	43.54
Light	2012-09-06 01:41:04	0.17	0.15	31.7		Sample6	144.7
Light	2012-09-06 01:36:04	0.17	0.16	31.7
Light	2012-09-06 01:31:05	0.19	0.16	31.7	Treatments	~32 (̊C)-Light	~32 (̊C)-Dark	~34.2 (̊C)-Light	~34.2 (̊C)-Dark	~32 (̊C)	~34.2 (̊C)
Light	2012-09-06 01:26:05	0.18	0.16	31.7	Responses	Downstream O2 - upstream O2	Downstream O2 - upstream O2	Downstream O2 - upstream O2	Downstream O2 - upstream O2	Pn/lRl
Light	2012-09-06 01:21:05	0.18	0.15	31.7	Sample1	0.173846	-0.170769	0.0975	-0.223077	1.01802	0.437069
Light	2012-09-06 01:16:04	0.17	0.15	31.7	Sample2	0.154615	-0.159231	0.0558333	-0.242308	0.971014	0.230423
Light	2012-09-06 01:11:05	0.18	0.17	31.7	Sample3	0.166154	-0.19	0.0891667	-0.268333	0.874494	0.332298
Light	2012-09-06 01:06:05	0.17	0.16	31.7	Sample4	0.216154	-0.208462	0.0641667	-0.2525	1.0369	0.254125
Dark	2012-09-06 04:36:04	-0.17	-0.16	31.7	Sample5	0.205833	-0.201429	0.115	-0.26375	1.02187	0.436019
Dark	2012-09-06 04:31:04	-0.16	-0.15	31.7	Sample6	0.518333	-0.367857	0.244167	-0.36	1.40906	0.678241
Dark	2012-09-06 04:26:04	-0.17	-0.16	31.6	Mean	0.239156	-0.216291	0.110972	-0.268328	1.05523	0.394696
Dark	2012-09-06 04:21:04	-0.17	-0.17	31.6
Dark	2012-09-06 04:16:04	-0.18	-0.17	31.7		Pn (mgO2.l-1. min-1)	R (mgO2.l-1. min-1)	Pn (mgO2.l-1. min-1)	R (mgO2.l-1. min-1)
Dark	2012-09-06 04:11:04	-0.16	-0.15	31.7	Sample1	0.0869231	-0.0853846	0.04875	-0.111538
Dark	2012-09-06 04:06:04	-0.18	-0.17	31.7	Sample2	0.0773077	-0.0796154	0.0279167	-0.121154
Dark	2012-09-06 04:01:04	-0.18	-0.17	31.6	Sample3	0.0830769	-0.095	0.0445833	-0.134167
Dark	2012-09-06 03:56:04	-0.17	-0.16	31.7	Sample4	0.108077	-0.104231	0.0320833	-0.12625
Dark	2012-09-06 03:51:04	-0.16	-0.14	31.7	Sample5	0.102917	-0.100714	0.0575	-0.131875
Dark	2012-09-06 03:46:04	-0.17	-0.16	31.6	Sample6	0.259167	-0.183929	0.122083	-0.18
Dark	2012-09-06 03:41:04	-0.18	-0.16	31.6	Mean	0.119578	-0.108146	0.0554861	-0.134164
Dark	2012-09-06 03:36:04	-0.17	-0.15	31.6
Light	2012-09-06 08:18:21	0.1	0.06	34.5
Light	2012-09-06 08:06:04	0.11	0.07	34.5
Light	2012-09-06 08:01:04	0.11	0.07	34.5
Light	2012-09-06 07:56:04	0.1	0.07	34.5
Light	2012-09-06 07:51:04	0.1	0.04	34.5
Light	2012-09-06 07:46:04	0.09	0.03	34.5
Light	2012-09-06 07:41:04	0.09	0.06	34.5
Light	2012-09-06 07:36:04	0.09	0.06	34.5
Light	2012-09-06 07:31:04	0.09	0.06	34.5
Light	2012-09-06 07:26:04	0.1	0.06	34.5
Light	2012-09-06 07:21:04	0.09	0.05	34.6
Light	2012-09-06 07:16:03	0.1	0.04	34.6
Dark	2012-09-06 11:33:27	-0.21	-0.23	34.4
Dark	2012-09-06 11:28:27	-0.23	-0.26	34.4
Dark	2012-09-06 11:23:27	-0.23	-0.24	34.4
Dark	2012-09-06 11:18:27	-0.22	-0.23	34.4
Dark	2012-09-06 11:13:27	-0.22	-0.24	34.4
Dark	2012-09-06 11:08:27	-0.23	-0.24	34.4
Dark	2012-09-06 11:03:27	-0.23	-0.25	34.4
Dark	2012-09-06 10:58:27	-0.22	-0.24	34.4
Dark	2012-09-06 10:53:27	-0.21	-0.23	34.4
Dark	2012-09-06 10:48:27	-0.22	-0.25	34.4
Dark	2012-09-06 10:43:27	-0.23	-0.25	34.4
Dark	2012-09-06 10:38:28	-0.23	-0.25	34.4
Dark	2012-09-06 10:33:28	-0.22	-0.24	34.4
		Sample3	Sample4
Light	2012-09-08 01:51:19	0.16	0.2	31.9
Light	2012-09-08 01:46:19	0.17	0.22	31.9
Light	2012-09-08 01:41:19	0.17	0.21	31.9
Light	2012-09-08 01:36:19	0.16	0.21	31.9
Light	2012-09-08 01:31:19	0.18	0.2	31.9
Light	2012-09-08 01:26:19	0.17	0.22	31.9
Light	2012-09-08 01:21:19	0.16	0.21	31.9
Light	2012-09-08 01:16:19	0.16	0.21	31.9
Light	2012-09-08 01:11:19	0.16	0.22	31.9
Light	2012-09-08 01:06:19	0.18	0.22	31.9
Light	2012-09-08 01:01:19	0.17	0.23	31.9
Light	2012-09-08 00:56:19	0.16	0.24	31.9
Light	2012-09-08 00:51:19	0.16	0.22	31.9
Dark	2012-09-08 04:46:18	-0.21	-0.19	32
Dark	2012-09-08 04:41:19	-0.18	-0.2	31.8
Dark	2012-09-08 04:36:19	-0.18	-0.2	31.8
Dark	2012-09-08 04:31:19	-0.2	-0.22	31.8
Dark	2012-09-08 04:26:19	-0.19	-0.21	31.8
Dark	2012-09-08 04:21:19	-0.18	-0.2	31.8
Dark	2012-09-08 04:16:19	-0.19	-0.21	31.8
Dark	2012-09-08 04:11:19	-0.19	-0.22	31.8
Dark	2012-09-08 04:06:19	-0.18	-0.21	31.8
Dark	2012-09-08 04:01:19	-0.18	-0.21	31.8
Dark	2012-09-08 03:56:19	-0.2	-0.21	31.8
Dark	2012-09-08 03:51:19	-0.2	-0.22	31.8
Dark	2012-09-08 03:46:19	-0.19	-0.21	31.8
Light	2012-09-08 07:57:31	0.1	0.06	34.8
Light	2012-09-08 07:52:31	0.1	0.05	34.8
Light	2012-09-08 07:47:31	0.09	0.07	34.8
Light	2012-09-08 07:42:31	0.11	0.05	34.8
Light	2012-09-08 07:37:31	0.1	0.06	34.8
Light	2012-09-08 07:32:30	0.08	0.07	34.7
Light	2012-09-08 07:27:30	0.09	0.07	34.7
Light	2012-09-08 07:22:30	0.08	0.07	34.7
Light	2012-09-08 07:17:31	0.06	0.04	34.6
Light	2012-09-08 07:12:31	0.08	0.09	34.6
Light	2012-09-08 07:07:31	0.08	0.07	34.6
Light	2012-09-08 07:02:31	0.1	0.07	34.6
Dark	2012-09-08 10:22:31	-0.27	-0.26	34.7
Dark	2012-09-08 10:17:31	-0.27	-0.26	34.7
Dark	2012-09-08 10:12:31	-0.27	-0.26	34.7
Dark	2012-09-08 10:07:31	-0.27	-0.25	34.7
Dark	2012-09-08 10:02:31	-0.28	-0.27	34.7
Dark	2012-09-08 09:57:31	-0.27	-0.25	34.7
Dark	2012-09-08 09:52:31	-0.25	-0.24	34.7
Dark	2012-09-08 09:47:31	-0.27	-0.26	34.7
Dark	2012-09-08 09:42:31	-0.27	-0.25	34.7
Dark	2012-09-08 09:37:31	-0.26	-0.23	34.7
Dark	2012-09-08 09:32:31	-0.27	-0.25	34.7
Dark	2012-09-08 09:27:30	-0.27	-0.25	34.7
		Sample5	Sample6
Light	2012-09-09 01:08:21	0.22	0.53	32
Light	2012-09-09 01:04:14	0.2	0.51	32
Light	2012-09-09 00:59:14	0.2	0.5	32
Light	2012-09-09 00:54:14	0.21	0.51	32
Light	2012-09-09 00:49:14	0.21	0.52	32
Light	2012-09-09 00:44:13	0.2	0.51	32
Light	2012-09-09 00:39:13	0.2	0.52	32
Light	2012-09-09 00:34:13	0.22	0.53	32
Light	2012-09-09 00:29:13	0.2	0.52	31.9
Light	2012-09-09 00:24:13	0.22	0.52	31.9
Light	2012-09-09 00:19:13	0.2	0.51	31.9
Light	2012-09-09 00:14:13	0.19	0.54	31.9
Dark	2012-09-09 04:33:22	-0.08	-0.37	31.8
Dark	2012-09-09 04:28:22	-0.2	-0.36	31.8
Dark	2012-09-09 04:23:22	-0.22	-0.38	31.8
Dark	2012-09-09 04:18:22	-0.22	-0.38	31.8
Dark	2012-09-09 04:13:22	-0.21	-0.36	31.8
Dark	2012-09-09 04:08:22	-0.2	-0.36	31.8
Dark	2012-09-09 04:03:21	-0.23	-0.39	31.8
Dark	2012-09-09 03:58:21	-0.2	-0.36	31.8
Dark	2012-09-09 03:53:22	-0.2	-0.35	31.8
Dark	2012-09-09 03:48:22	-0.21	-0.37	31.8
Dark	2012-09-09 03:43:22	-0.22	-0.37	31.8
Dark	2012-09-09 03:38:22	-0.21	-0.36	31.8
Dark	2012-09-09 03:33:22	-0.2	-0.36	31.8
Dark	2012-09-09 03:28:21	-0.22	-0.38	31.8
Light	2012-09-09 07:08:21	0.11	0.25	34.8
Light	2012-09-09 07:03:21	0.11	0.25	34.8
Light	2012-09-09 06:58:21	0.12	0.25	34.8
Light	2012-09-09 06:53:22	0.12	0.24	34.8
Light	2012-09-09 06:48:22	0.13	0.24	34.8
Light	2012-09-09 06:43:22	0.1	0.24	34.8
Light	2012-09-09 06:38:21	0.12	0.24	34.8
Light	2012-09-09 06:33:21	0.12	0.25	34.8
Light	2012-09-09 06:28:21	0.11	0.24	34.8
Light	2012-09-09 06:23:21	0.12	0.25	34.8
Light	2012-09-09 06:18:21	0.11	0.24	34.8
Light	2012-09-09 06:13:21	0.11	0.24	34.8
Dark	2012-09-09 10:07:39	-0.25	-0.38	34.7
Dark	2012-09-09 10:02:39	-0.27	-0.38	34.7
Dark	2012-09-09 09:57:39	-0.26	-0.37	34.7
Dark	2012-09-09 09:52:38	-0.26	-0.37	34.7
Dark	2012-09-09 09:03:21	-0.25	-0.33	34.7
Dark	2012-09-09 08:58:21	-0.27	-0.35	34.7
Dark	2012-09-09 08:53:21	-0.28	-0.36	34.7
Dark	2012-09-09 08:48:22	-0.27	-0.34	34.7
