# Supplementary material for: Photosynthetic response of Persian Gulf acroporid corals to summer versus winter temperature deviations
Source: PeerJ. 2015 Jun 30;3:e1062. doi: 10.7717/peerj.1062 (PMC4493696; doi:10.7717/peerj.1062)
Supplement: Supplemental Information 3 [file peerj-03-1062-s003.xlsx]

## Sheet: Sheet1
Date and time	Downstream O2(mg/l) - upstream O2 (mg/l)	Rate of Pn (mgO2.l-1. min-1)	Experimental temperature (°C)
2012-08-21 10:54:21	0.19	0.095	32.1
2012-08-21 10:49:21	0.19	0.095	32.1
2012-08-21 10:44:21	0.17	0.085	32.1
2012-08-21 10:34:21	0.19	0.095	32.1
2012-08-21 10:29:21	0.18	0.09	32
2012-08-21 10:24:21	0.19	0.095	32.1
2012-08-21 10:19:21	0.21	0.105	32
2012-08-21 05:54:10	0.21	0.105	32
2012-08-21 05:49:10	0.2	0.1	32
2012-08-21 05:44:10	0.21	0.105	32
2012-08-21 05:39:10	0.21	0.105	32
2012-08-21 05:34:10	0.21	0.105	32
2012-08-21 05:29:10	0.22	0.11	32
2012-08-21 05:24:10	0.22	0.11	32
2012-08-21 05:19:10	0.22	0.11	32
2012-08-21 05:14:10	0.21	0.105	32
2012-08-21 05:09:10	0.22	0.11	32
2012-08-21 05:04:10	0.21	0.105	32
2012-08-21 04:59:10	0.21	0.105	32
2012-08-21 04:54:10	0.2	0.1	32
2012-08-21 04:49:10	0.19	0.095	32
2012-08-21 04:44:10	0.18	0.09	32
2012-08-21 04:39:10	0.21	0.105	32
2012-08-21 04:34:10	0.24	0.12	32
2012-08-21 04:29:10	0.19	0.095	32
2012-08-21 04:24:10	0.17	0.085	32
2012-08-21 04:19:10	0.2	0.1	32
2012-08-21 04:14:10	0.18	0.09	32
2012-08-21 04:09:10	0.22	0.11	32
2012-08-21 04:04:10	0.2	0.1	32
2012-08-21 03:59:10	0.17	0.085	32
2012-08-21 03:54:10	0.21	0.105	32
2012-08-21 03:49:10	0.19	0.095	32
2012-08-21 03:44:10	0.19	0.095	32
2012-08-21 03:39:10	0.18	0.09	32
2012-08-21 03:34:10	0.19	0.095	32
2012-08-21 03:29:10	0.18	0.09	32
2012-08-21 03:24:10	0.21	0.105	32
2012-08-21 03:19:10	0.19	0.095	32
2012-08-21 03:14:10	0.17	0.085	32
2012-08-21 03:09:10	0.19	0.095	32
2012-08-21 03:04:10	0.18	0.09	32
2012-08-21 02:59:10	0.19	0.095	32
2012-08-21 02:54:10	0.21	0.105	32
2012-08-21 02:49:10	0.17	0.085	32
2012-08-21 02:44:10	0.18	0.09	32
2012-08-21 02:39:10	0.21	0.105	32
2012-08-21 02:34:10	0.19	0.095	32
2012-08-21 02:29:10	0.19	0.095	32
2012-08-21 02:24:10	0.19	0.095	32.1
2012-08-21 02:19:10	0.17	0.085	32.1
2012-08-21 02:14:10	0.19	0.095	32.1
2012-08-21 02:09:10	0.19	0.095	32.1
2012-08-21 02:04:10	0.18	0.09	32.1
2012-08-21 01:59:10	0.18	0.09	32.1
2012-08-21 01:54:10	0.18	0.09	32.1
2012-08-21 01:49:10	0.18	0.09	32.1
2012-08-21 01:44:10	0.18	0.09	32.1
2012-08-21 01:39:10	0.18	0.09	32.1
2012-08-21 01:34:10	0.19	0.095	32.1
2012-08-21 01:29:10	0.18	0.09	32.1
2012-08-21 01:24:10	0.18	0.09	32.1
2012-08-21 01:19:10	0.18	0.09	32.1
2012-08-21 01:14:10	0.18	0.09	32.1
2012-08-21 01:09:10	0.16	0.08	32.1
2012-08-21 01:04:10	0.19	0.095	32.1
2012-08-21 00:59:10	0.19	0.095	32.1
2012-08-21 00:54:10	0.18	0.09	32.1
2012-08-21 00:49:10	0.16	0.08	32.1
2012-08-21 00:44:10	0.18	0.09	32.1
2012-08-21 00:39:10	0.17	0.085	32
2012-08-21 00:34:10	0.19	0.095	32
2012-08-21 00:29:10	0.17	0.085	32
2012-08-21 00:24:10	0.14	0.07	32
2012-08-21 00:19:10	0.19	0.095	32
2012-08-21 00:14:10	0.14	0.07	32
2012-08-21 00:09:10	0.14	0.07	32
2012-08-21 00:04:10	0.16	0.08	32
2012-08-20 23:59:10	0.14	0.07	32
2012-08-20 23:54:10	0.17	0.085	32
2012-08-20 23:49:10	0.14	0.07	32
2012-08-20 23:44:10	0.17	0.085	32.1
2012-08-20 23:39:10	0.16	0.08	32.1
2012-08-20 23:34:10	0.13	0.065	32.1
2012-08-20 23:29:10	0.15	0.075	32.1
2012-08-20 23:24:10	0.15	0.075	32.1
2012-08-20 23:19:10	0.13	0.065	32.1
2012-08-20 23:14:10	0.13	0.065	32.1
2012-08-20 23:09:10	0.13	0.065	32.1
2012-08-20 23:04:10	0.14	0.07	32.1
2012-08-20 22:59:10	0.11	0.055	32.1
2012-08-20 22:54:10	0.11	0.055	32.1
2012-08-20 22:49:10	0.12	0.06	32.1
2012-08-20 22:44:10	0.1	0.05	32
2012-08-20 22:39:10	0.08	0.04	32
2012-08-20 22:34:10	0.05	0.025	32
2012-08-20 22:29:10	-0.01	-0.005	32
